# Supplementary material
Source: Springer Nature journal article supplement (https://www.springermedizin.de/resource/supplementary/12878_2011_60_MOESM3_ESM.pdf/9441648)

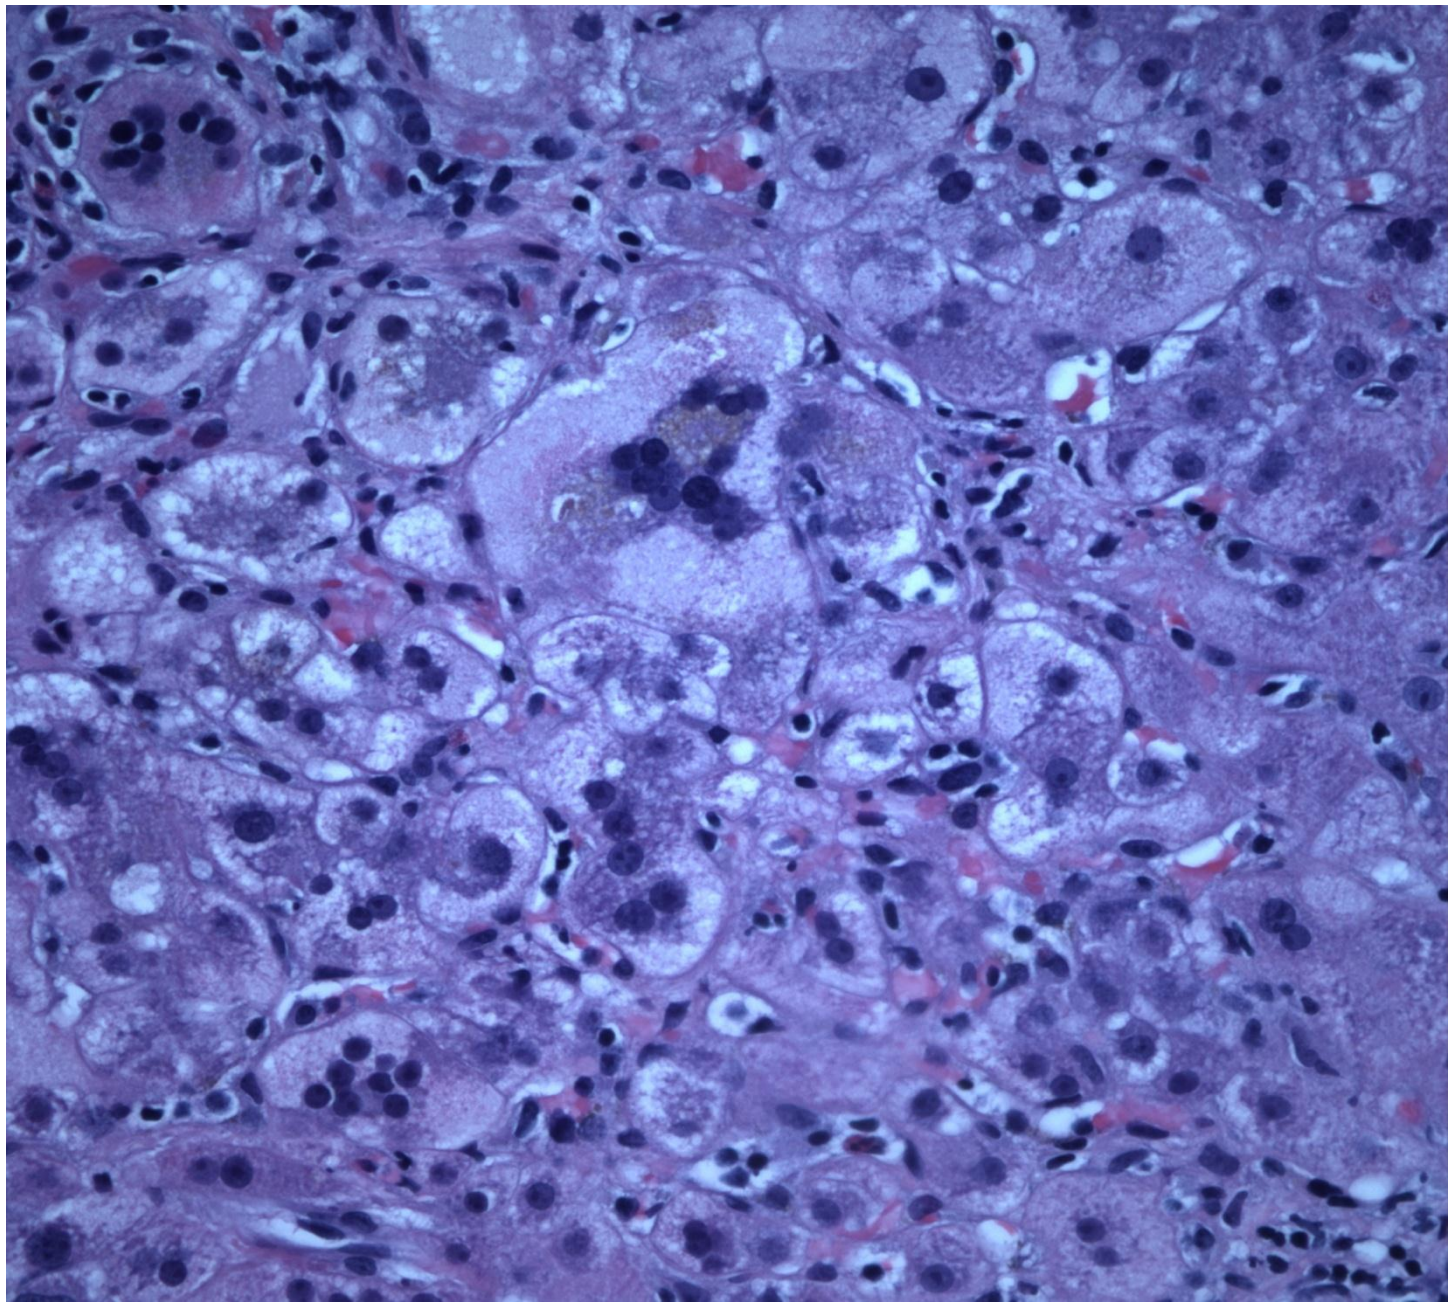

Supplement: MOESM3 [file 9441648]
